# Supplementary material for: Highly replicating hepatitis C virus variants emerge in immunosuppressed patients causing severe disease
Source: Research Square preprint supplement (doi:10.21203/rs.3.rs-6194507/v1), 2025-06-09
Supplement: Supplementary file 1 [file d447d6b195454e3e6c607c78.pdf]

**Highly replicating hepatitis C virus variants emerge in immunosuppressed patients causing severe disease**

Paul Rothhaar, Christian Heuss, Margaret Tulessin, Zhiqing Wang, Ha Gyu-Thomas Seong, Colin Förster, Jocelyn Quistrebert, Haiting Chai, Marvin Reineke, Louise Benning, Jonathan Honegger, Maïke Hofmann, Robert Thimme, Jörg Timm, STOPHCV investigators, Paul Schnitzler, Uta Merle, Naglaa H. Shoukry, Julie Bruneau, Chaturaka Rodrigo, Andrew Lloyd, Rowena A. Bull, M. Azim Ansari, Carolin Mogler, John McLauchlan, Xavier Forns, Sofía Pérez-del-Pulgar, Volker Lohmann

Supplementary Figure S1-S9

Supplementary Table S1-S3

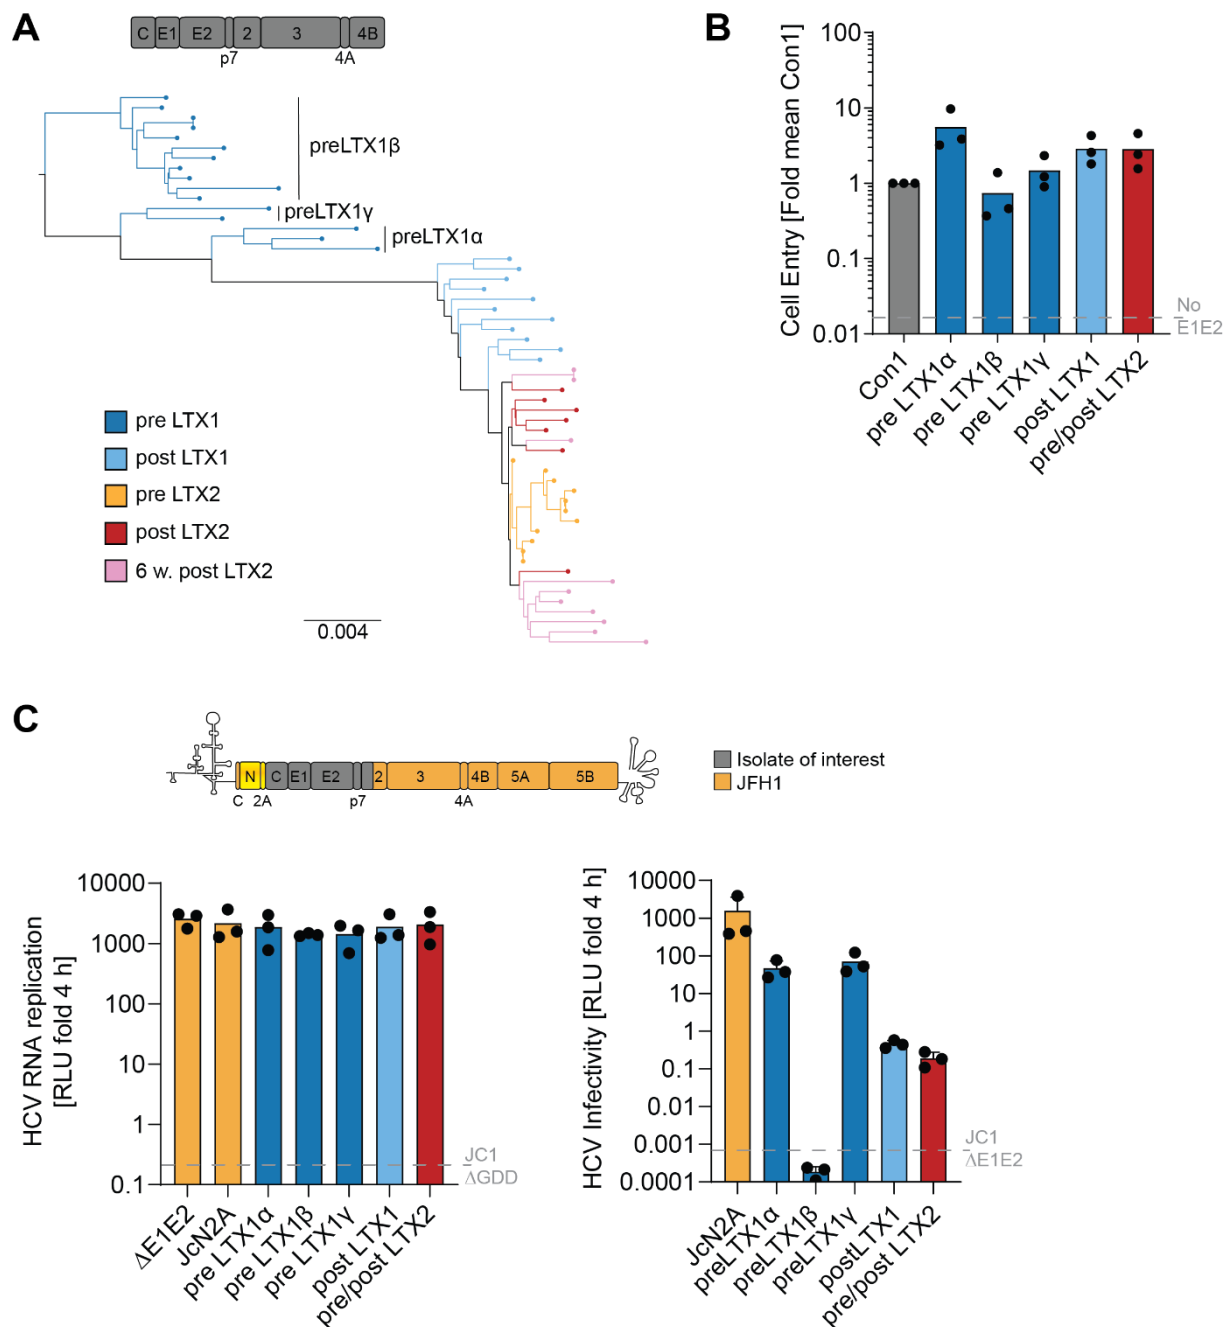

**Fig. S1: Phenotypic characterization of the evolution of the assembly module in the GLT1 patient.** A) Phylogenetic tree for the first PCR fragment which includes the whole assembly module. B) HCVpp bearing HCV envelope proteins of the indicated isolates on their surface were added to Huh7-Lunet CD81 cells. After 72 h, cells were lysed, and infectivity was determined based on a luciferase reporter in the HCVpp. Measurements were first normalised to the input determined via SG-PERT and then normalised to the Con1 reference isolate. Particles without envelope proteins (No E1E2) served as negative control. C) Huh7-Lunet CD81 cells were transfected with the chimeric full-length HCV reporter construct depicted in the upper panel. It combines the sequence of the isolate of interest up to the C3 junction site in NS2 with the remaining part of the JFH1 isolate<sup>89</sup>. RNA replication was determined at 72 hours post transfection (left panel) and the supernatant was used to infect naïve Huh7-Lunet CD81 cells. At 72 hours post infection, cells were lysed, and infectivity was determined via luciferase measurement (right panel). A replication deficient JC1 variant (JC1 ΔGDD) and a JC1 variant lacking envelope proteins (JC1 ΔE1E2) were used as negative controls for replication and infection respectively. B&C) Data

are from three independent biological replicates measured in technical duplicates. Each dot depicts the result of one replicate and the bar indicates the mean of all replicates.

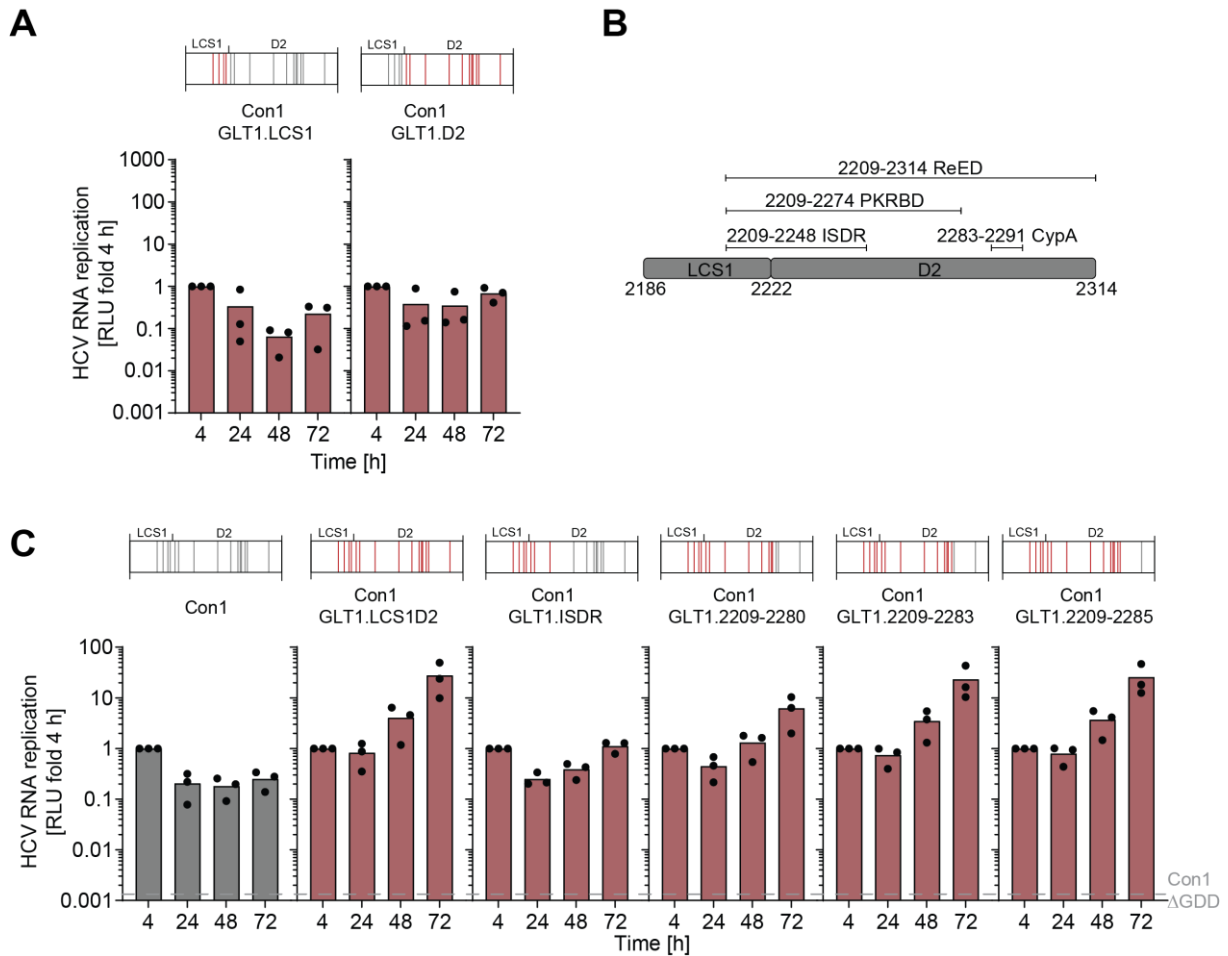

**Fig. S2: Mapping of relevant residues in the ReED.** A&C) SGRs of the indicated constructs were electroporated into Huh7-Lunet SEC14L2 cells, luciferase activity in cell lysates (RLU) was quantified as a correlate of RNA replication efficiency at the given time points and normalised to 4 h to account for differences in transfection efficiency. Con1  $\Delta$ GDD served as a replication deficient negative control. Data are from three independent biological replicates measured in technical duplicates. Each dot depicts the result of one replicate and the bar indicates the mean of all replicates. B) Schematic illustrating LCS1D2, informing about the location of the ReED, the ISDR<sup>18</sup>, the PKR binding domain (PKRBD)<sup>24</sup> and the Cyclophilin A (CypA) binding site<sup>23</sup>.

**A**

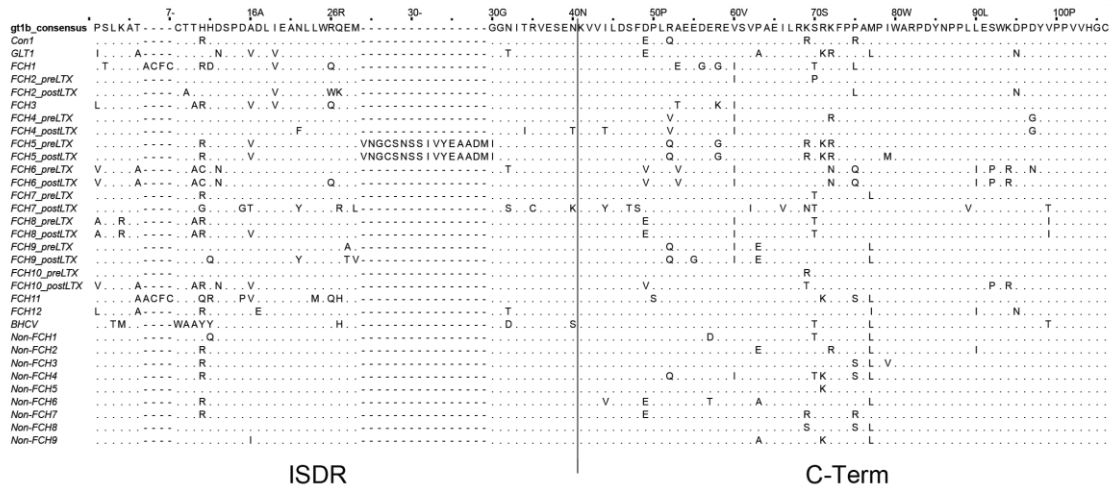

**B**

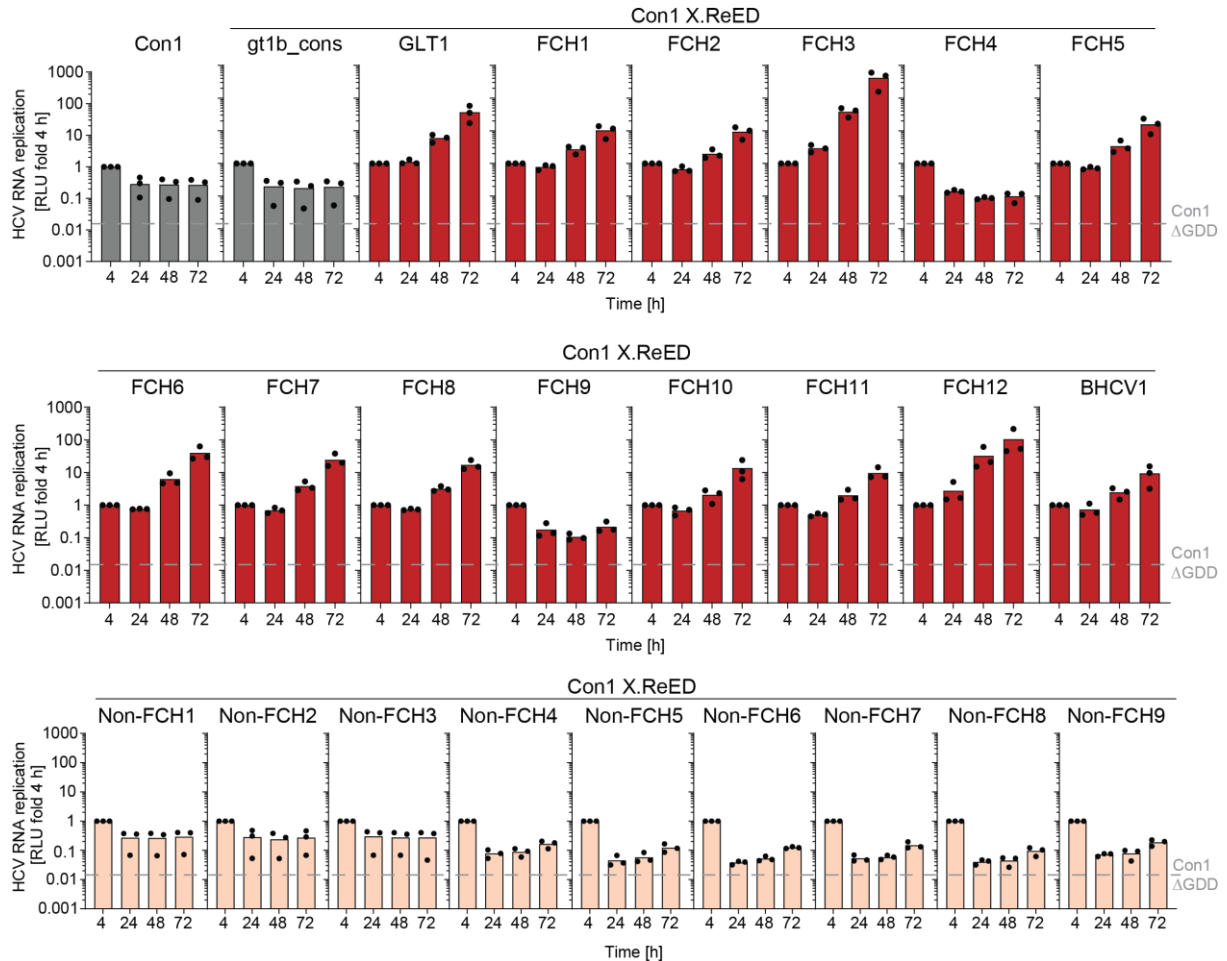

**Fig. S3: Replication kinetics of SGRs from the FCH cohort.** A) Amino acid alignment of all ReED sequences from the FCH cohort, using the genotype 1b consensus ReED as a reference. Dots indicate an amino acid being identical to the gt1b consensus. Note that also pre LTX sequences are shown when available. B) SGRs of the indicated constructs were electroporated into Huh7-Lunet SEC14L2 cells, luciferase activity in cell lysates (RLU) was quantified as a correlate of RNA replication efficiency at the given time points and normalised to 4 h to account for differences in transfection efficiency. Con1  $\Delta$ GDD served as a replication deficient negative control. Data are

from three independent biological replicates measured in technical duplicates. Each dot depicts the result of one replicate and the bar indicates the mean of all replicates.

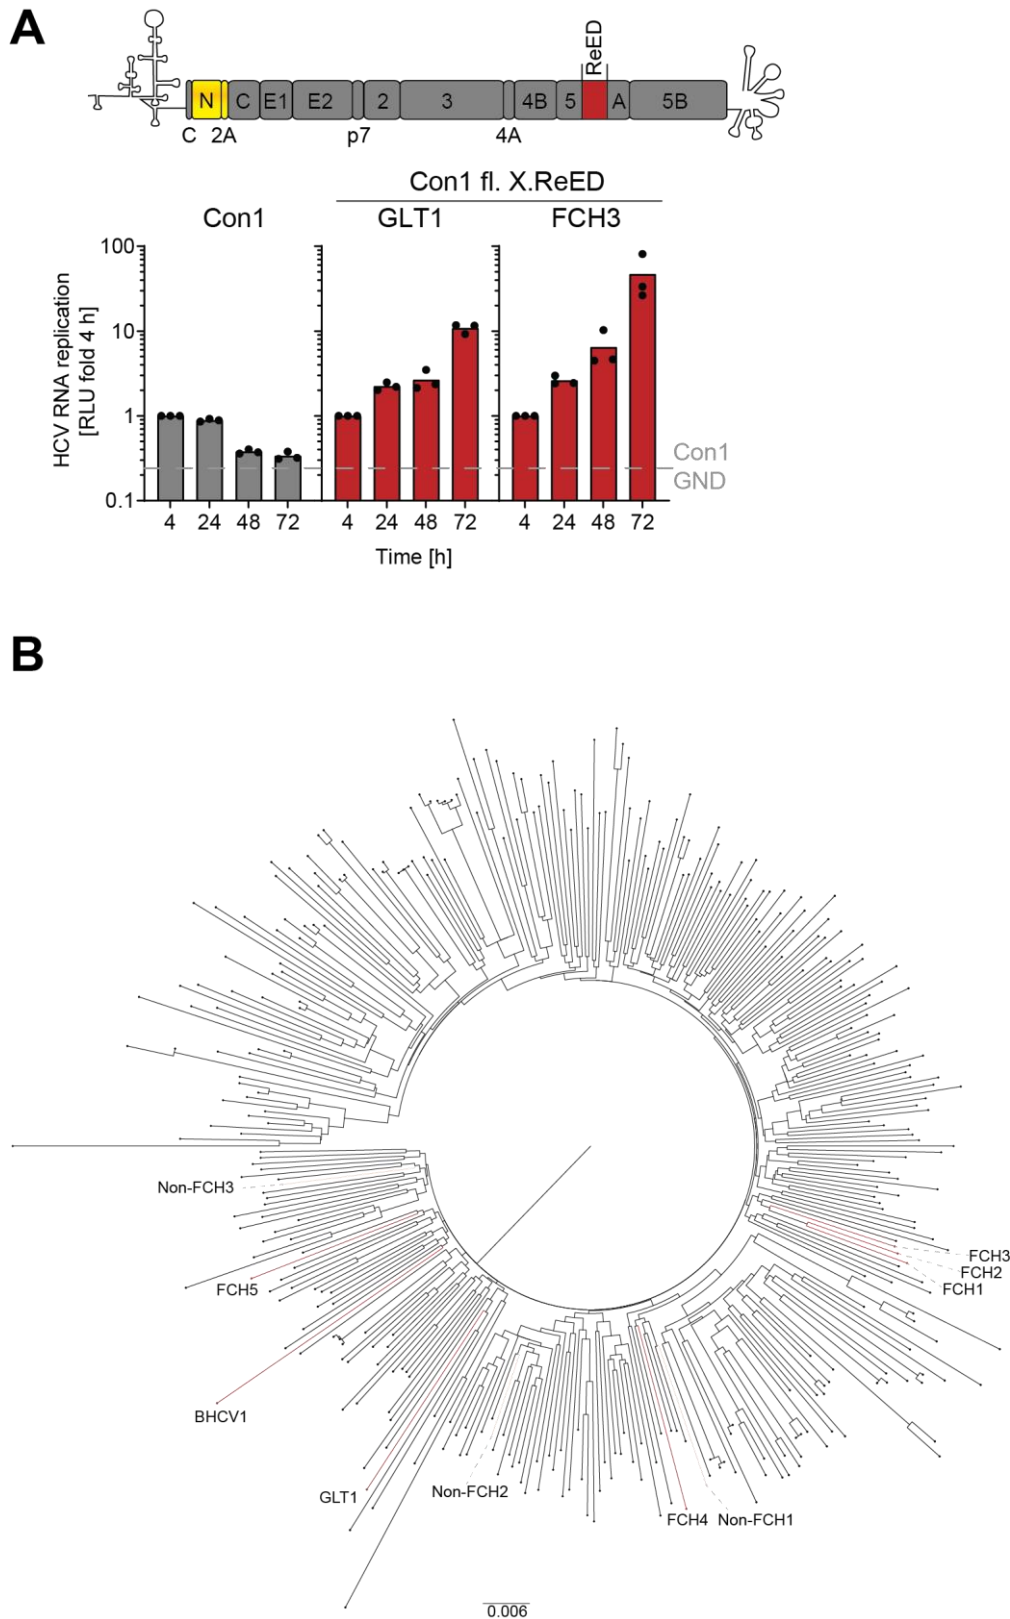

**Fig. S4: Full-length and phylogenetic studies on the FCH cohort.** A) Full-length replicons of the indicated constructs were electroporated into Huh7-Lunet SEC14L2 cells, luciferase activity in cell lysates (RLU) was quantified as a correlate of RNA replication efficiency at the given time points and normalised to 4 h to account for differences in transfection efficiency. Con1 GND

served as replication deficient negative controls. Data are from three independent biological replicates measured in technical duplicates. Each dot depicts the result of one replicate and the bar indicates the mean of all replicates. B) Phylogenetic tree of *gt1b* isolates retrieved from ViPR<sup>74</sup>. Highlighted are the 7 FCH (red) and 3 non-FCH (apricot) patients for which complete replicase sequences post LTX were available. Accession numbers: FCH1 - MK092096, FCH2 - MK092098, FCH3 - MK092100, FCH4 - MK092102, FCH5 - MK092104, BHCV1 - HQ719473, GLT1 - OM222702, Non-FCH1 - MK092106, Non-FCH2 - MK092108, Non-FCH3 - MK092110.

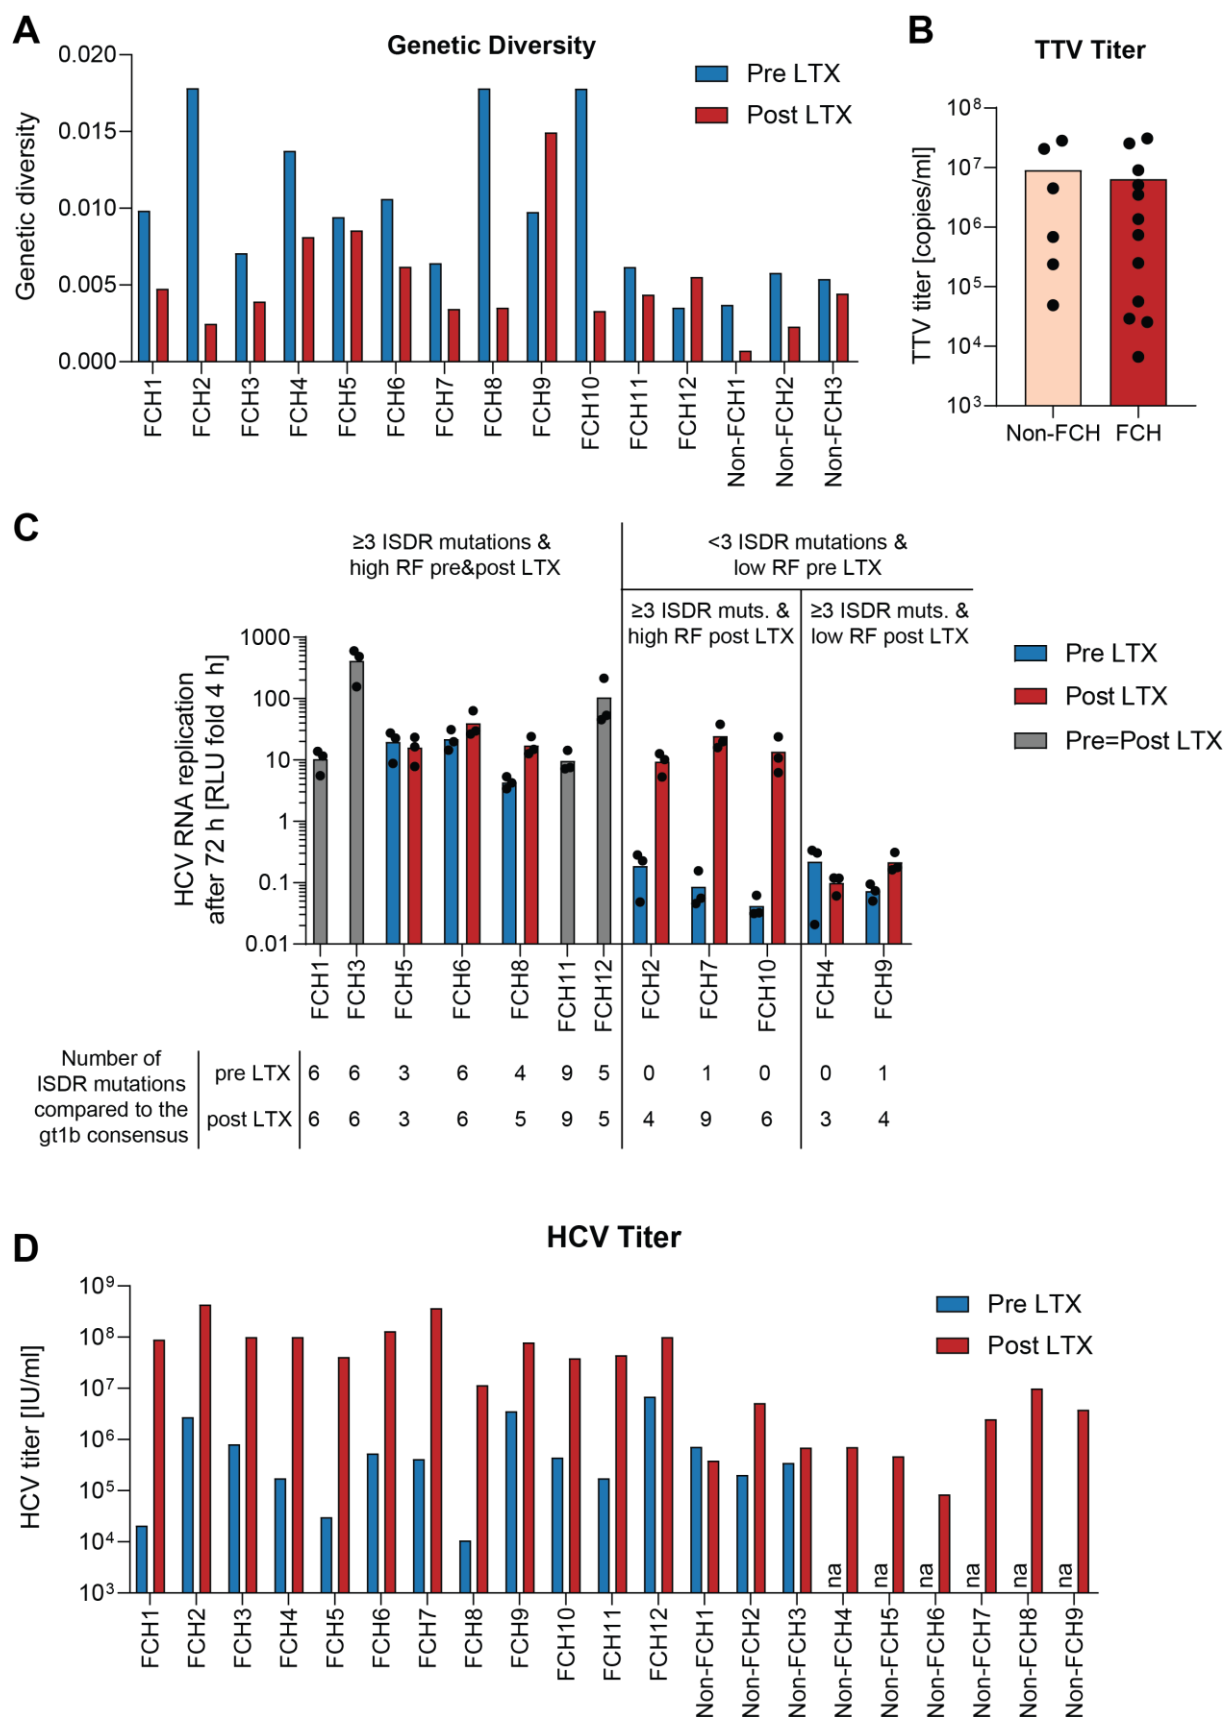

**Fig. S5: Patient characteristics and evolution of RF in the FCH cohort.** A&D) Data on genetic diversity based on NGS analysis of NS5B (A) and HCV serum titers pre and post LTX for FCH1-12 and non-FCH1-3 (D) were previously published in bulk<sup>26</sup> and are here stratified by patient. No genetic diversity data and no pre LTX titers were available for non-FCH4-9. B) Torque teno virus

(TTV) titers in post LTX patient serum were determined via qPCR. C) For the determination of ISDR mutations (lower panel), an insertion was counted as one mutation irrespective of its length. SGRs of the indicated constructs were electroporated into Huh7-Lunet SEC14L2 cells, luciferase activity in cell lysates (RLU) was quantified as a correlate of RNA replication efficiency and normalised to 4 h to account for differences in transfection efficiency. Displayed is the time point 72 h post electroporation, data for the post LTX samples is taken from (Fig. S3B). Data are from three independent biological replicates measured in technical duplicates. Each dot depicts the result of one replicate and the bar indicates the mean of all replicates.



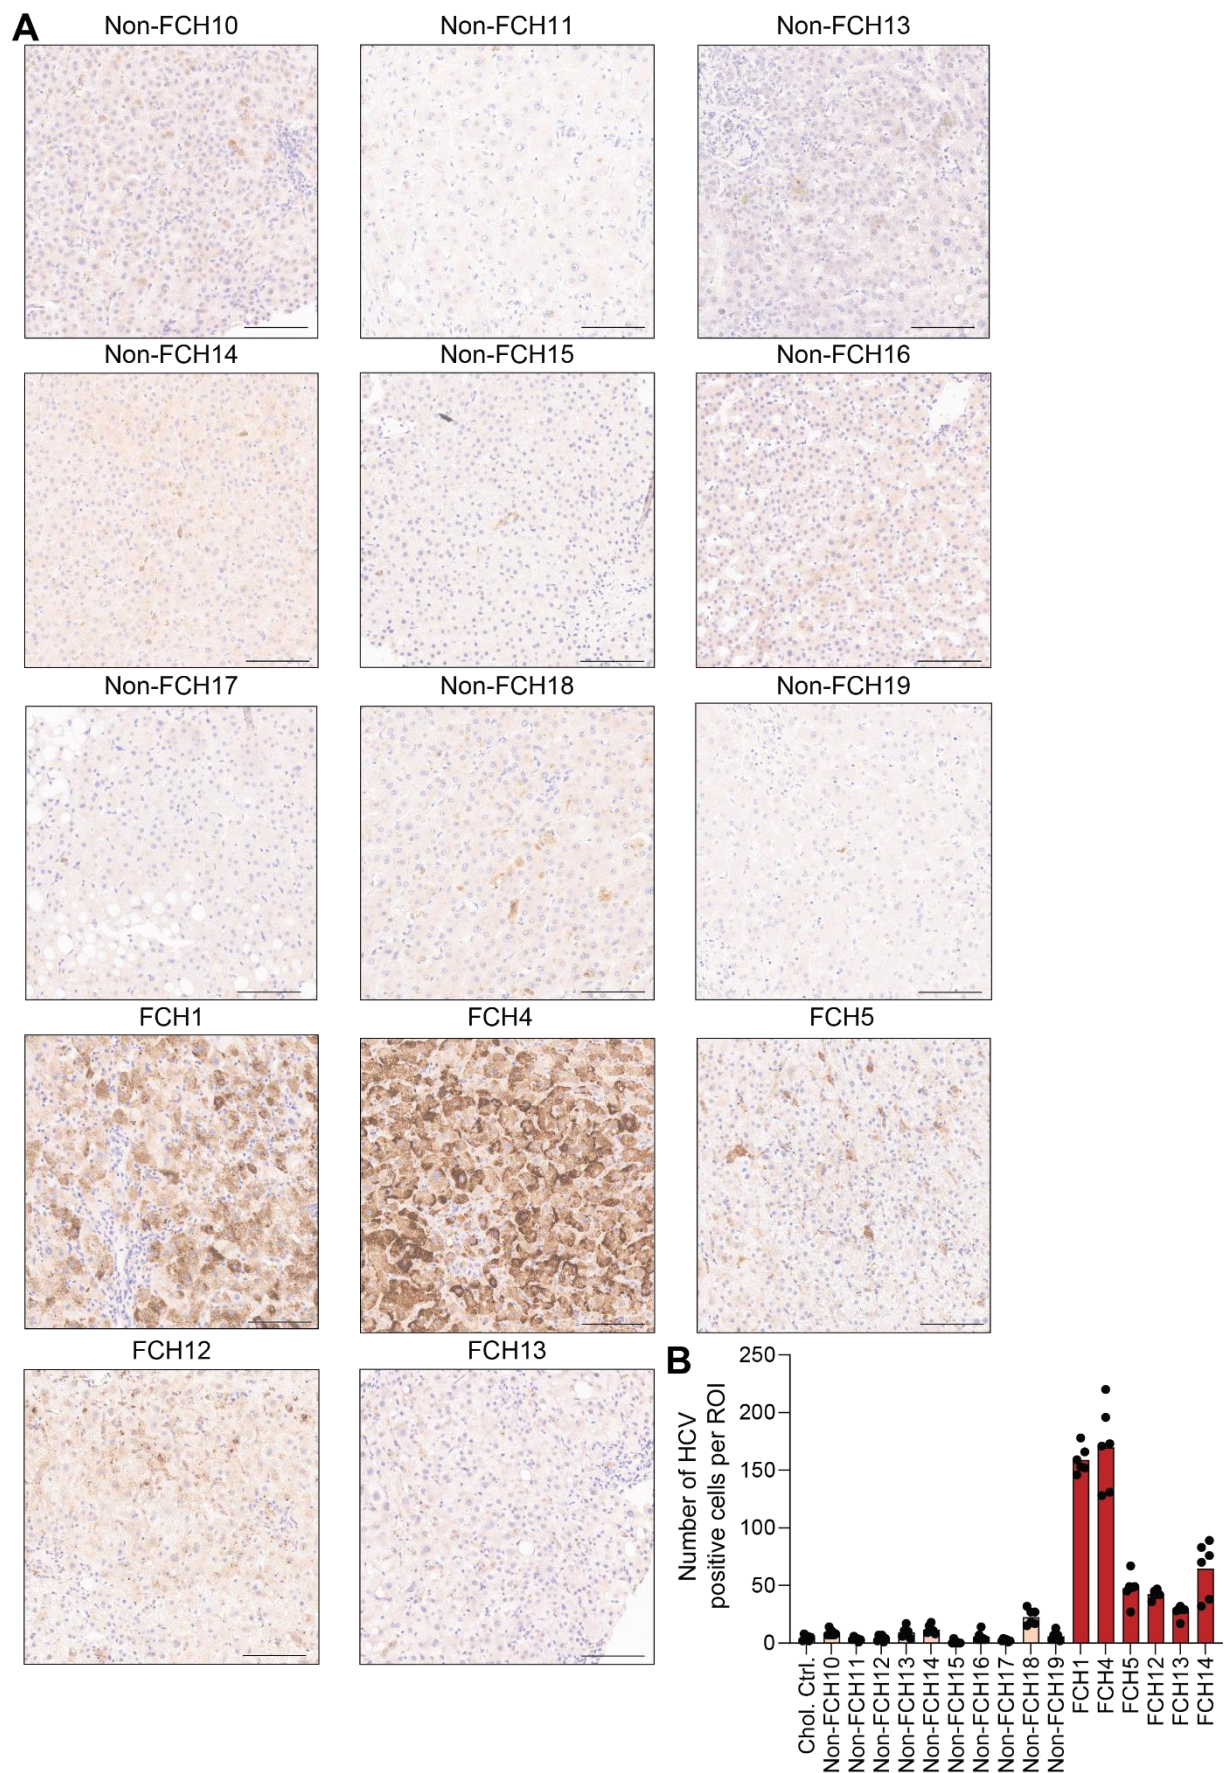

**Fig. S6: Representative images of IHC stained liver tissue sections.** A) An HCV NS5A specific antibody was used for staining. Representative images showing one quantified ROI per patient for

the patients not displayed in Fig. 3D. Scale bars indicate 100  $\mu\text{m}$ . B) Quantification displayed in Fig. 3D stratified by patient. Chol. Ctrl. represents an HCV negative cholestatic liver. Note that only patients FCH1, 4, 5 and 12 overlap with the patients characterised in Fig. 3A-C due to limited availability of samples.

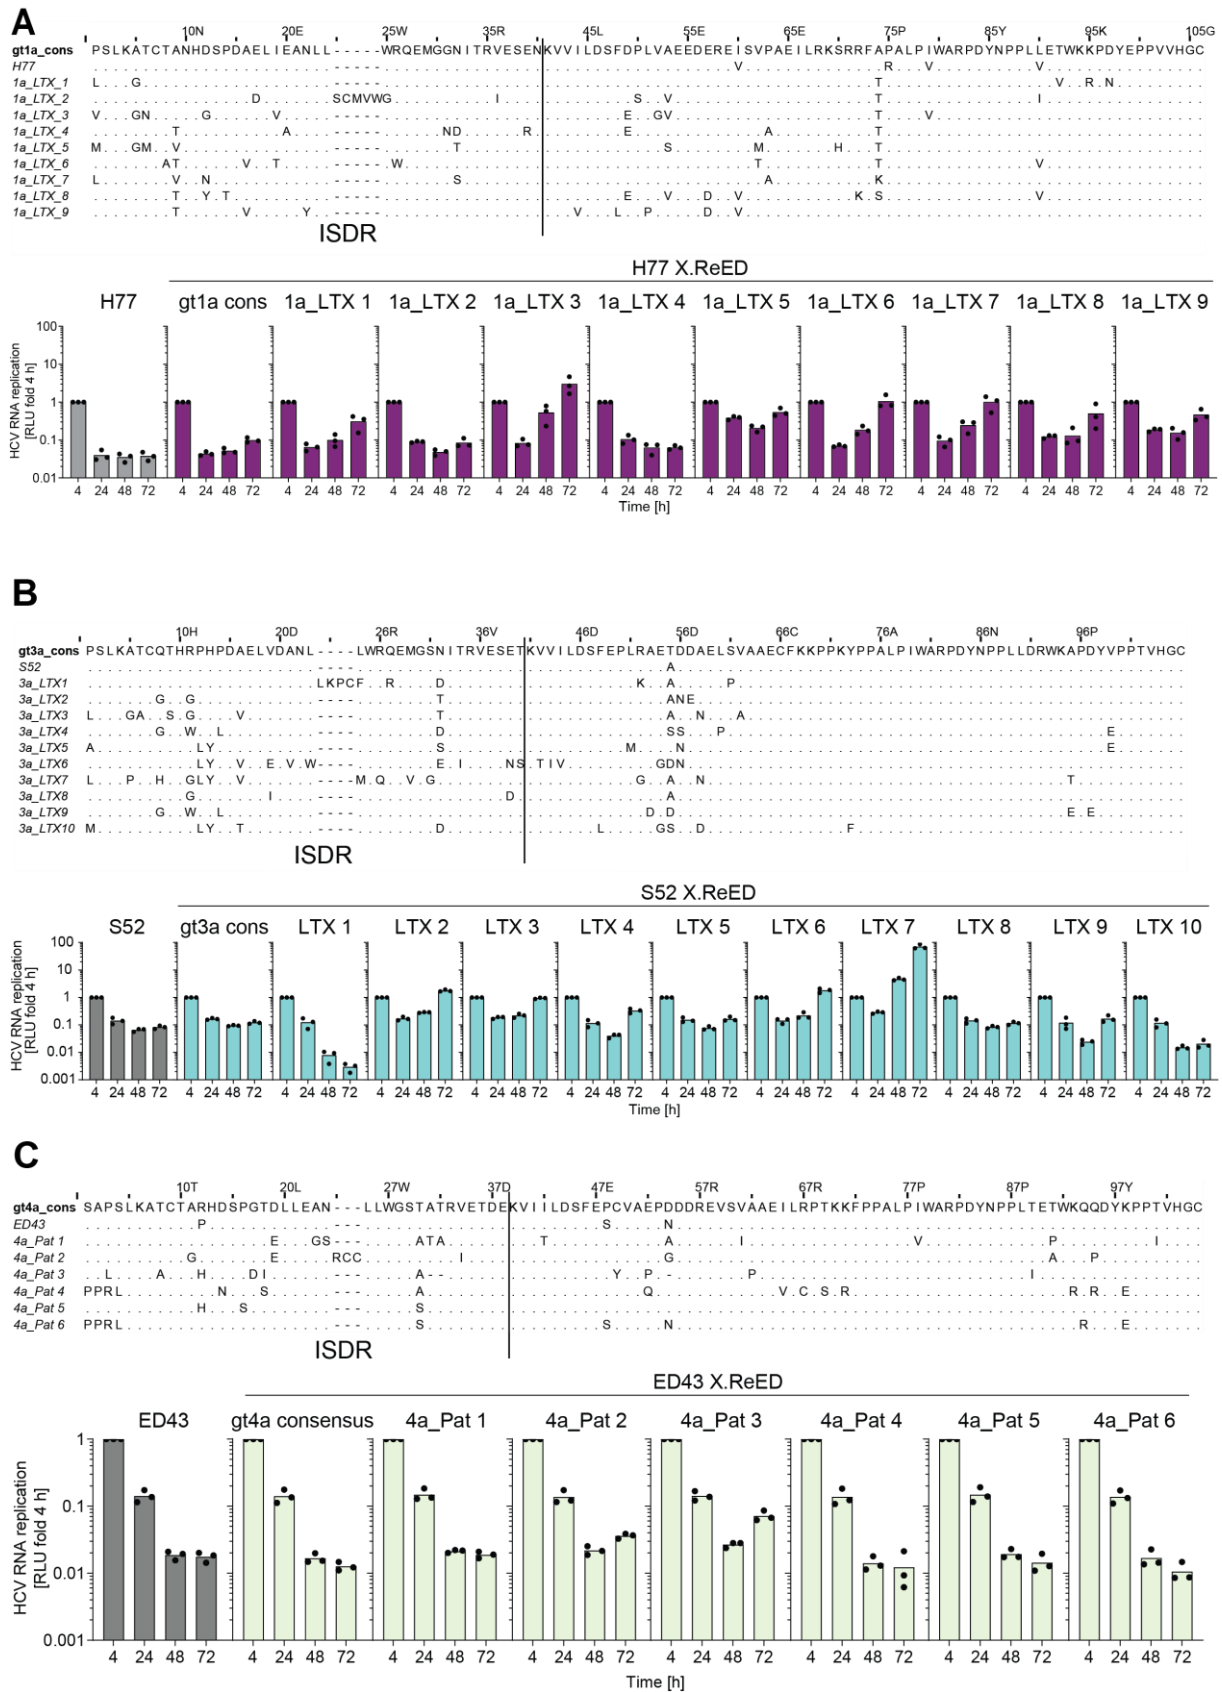

**Fig. S7: Replication kinetics of chimeric SGRs from gts 1a, 3a and 4a.** Upper panels depict amino acid sequence alignments of patient derived ReEDs compared to either the gt1a (A), gt3a (B) or gt4a (C) consensus. Dots indicate an amino acid being identical to the gt1b consensus. Lower panels show replication data. SGRs of the indicated constructs were electroporated into

Huh7-Lunet SEC14L2 cells, luciferase activity in cell lysates (RLU) was quantified as a correlate of RNA replication efficiency at the given time points and normalised to 4 h to account for differences in transfection efficiency. H77  $\Delta$ GDD/ Con1  $\Delta$ GDD served as a replication deficient negative control. Data are from three independent biological replicates measured in technical duplicates. Each dot depicts the result of one replicate and the bar indicates the mean of all replicates.

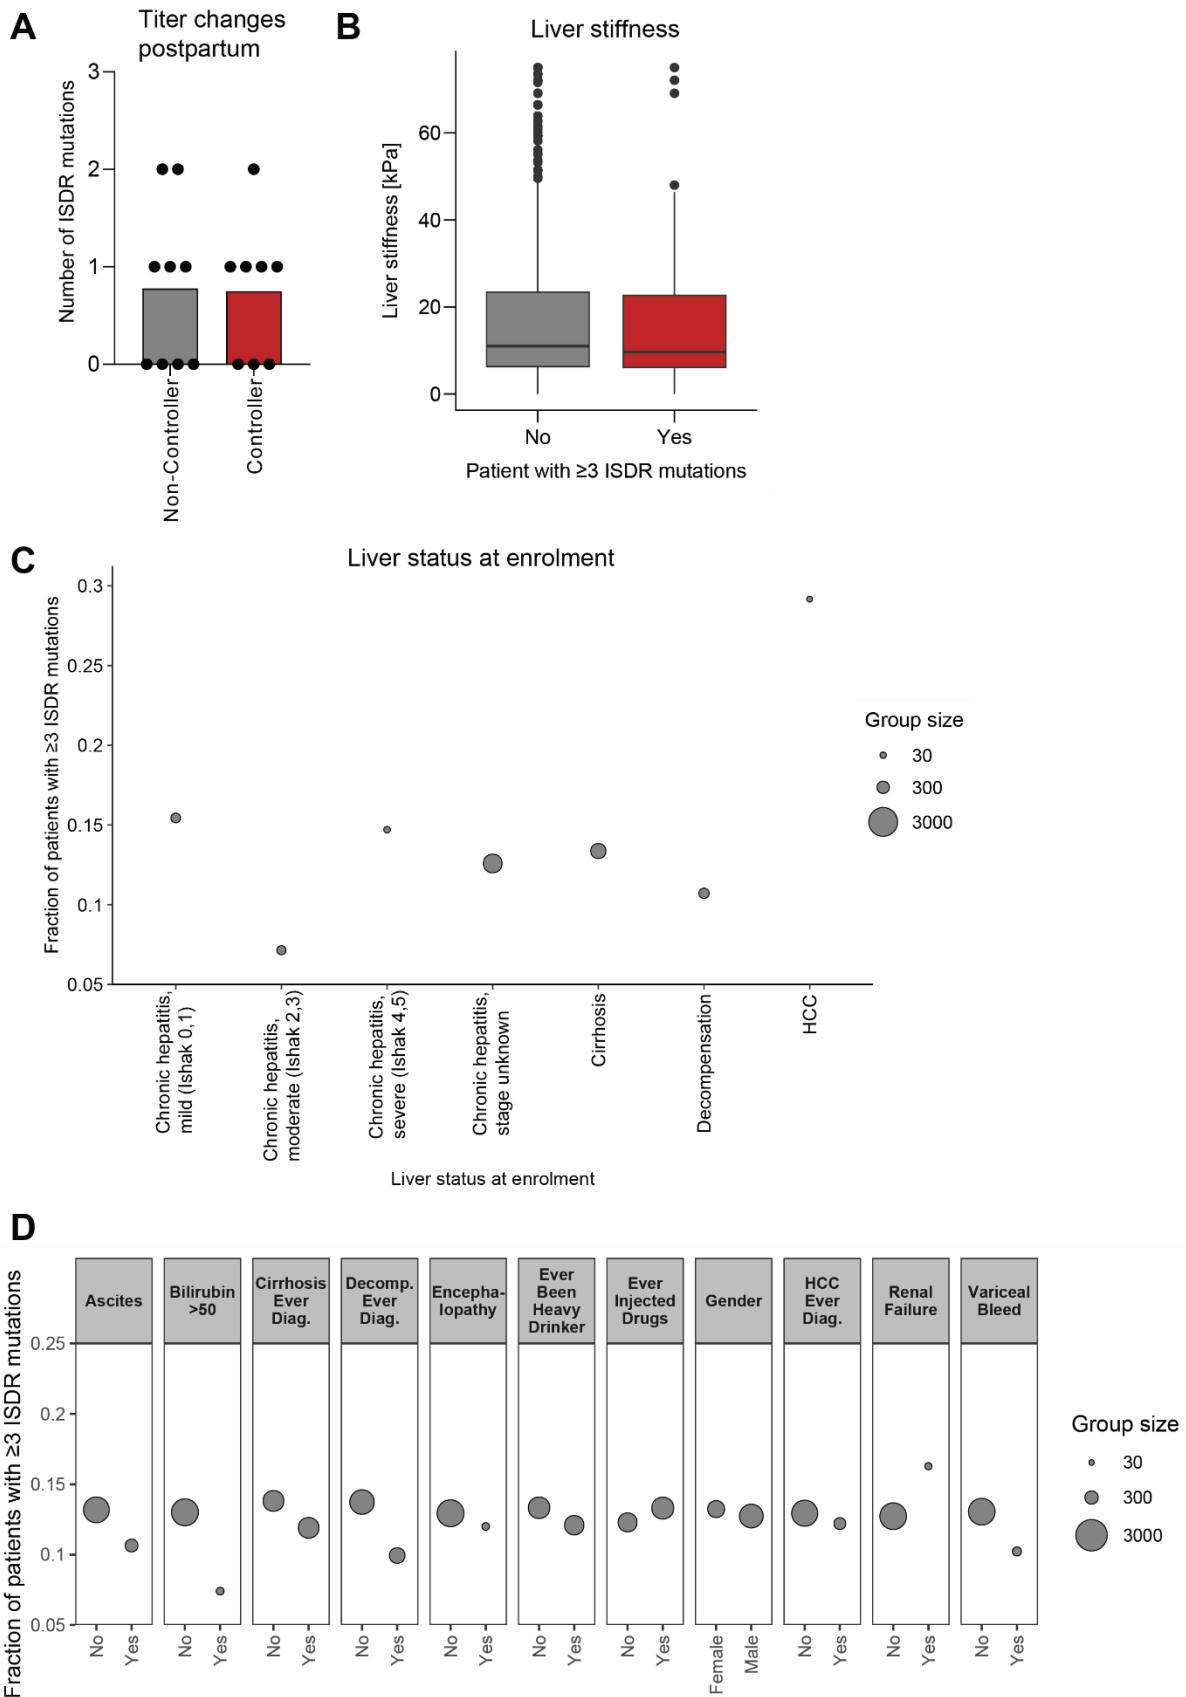

**Fig. S8: Sequence signatures of high RF in various clinical contexts.** A) HCV serum titers for each patient were determined in the third trimester of pregnancy and 3 months postpartum. If the HCV titers dropped by more than 1 log postpartum, patients were considered controllers<sup>37</sup>.

Combined data of 10 gt1a, 1 gt1b, 1 gt2a, 1 gt2b and 4 gt3a patients. For each patient the number of ISDR amino acid differences compared to the gt specific consensus was determined. No dominant amino acid changes in the ISDR between the two time points was detected in any of the patients thus the results represent both the third trimester of pregnancy and 3 months postpartum time points. B-D) Data based on the HCV Research UK cohort<sup>32</sup>. Data for gts 1a, 1b and 3a were pooled. For each patient's ISDR sequence, the number of amino acid differences compared to the gt specific consensus sequence was determined. If an ISDR had 3 or more mutations, the patient was considered to be infected with a potential high replicator. Post LTX patients were excluded from the analysis. B) Fraction of high replicators in the context of liver stiffness determined via Fibroscan. 112 potential high replicators were compared to 768 potential low replicators. C&D) Fraction of high replicators in the context of liver status at the time point of sequencing (C) or a variety of other contexts (D). Statistical significance was determined using a two-sided Student's t-test (B) or a Fisher's exact test (C&D). In none of the cases, a significant enrichment of potential high replicators was detected.

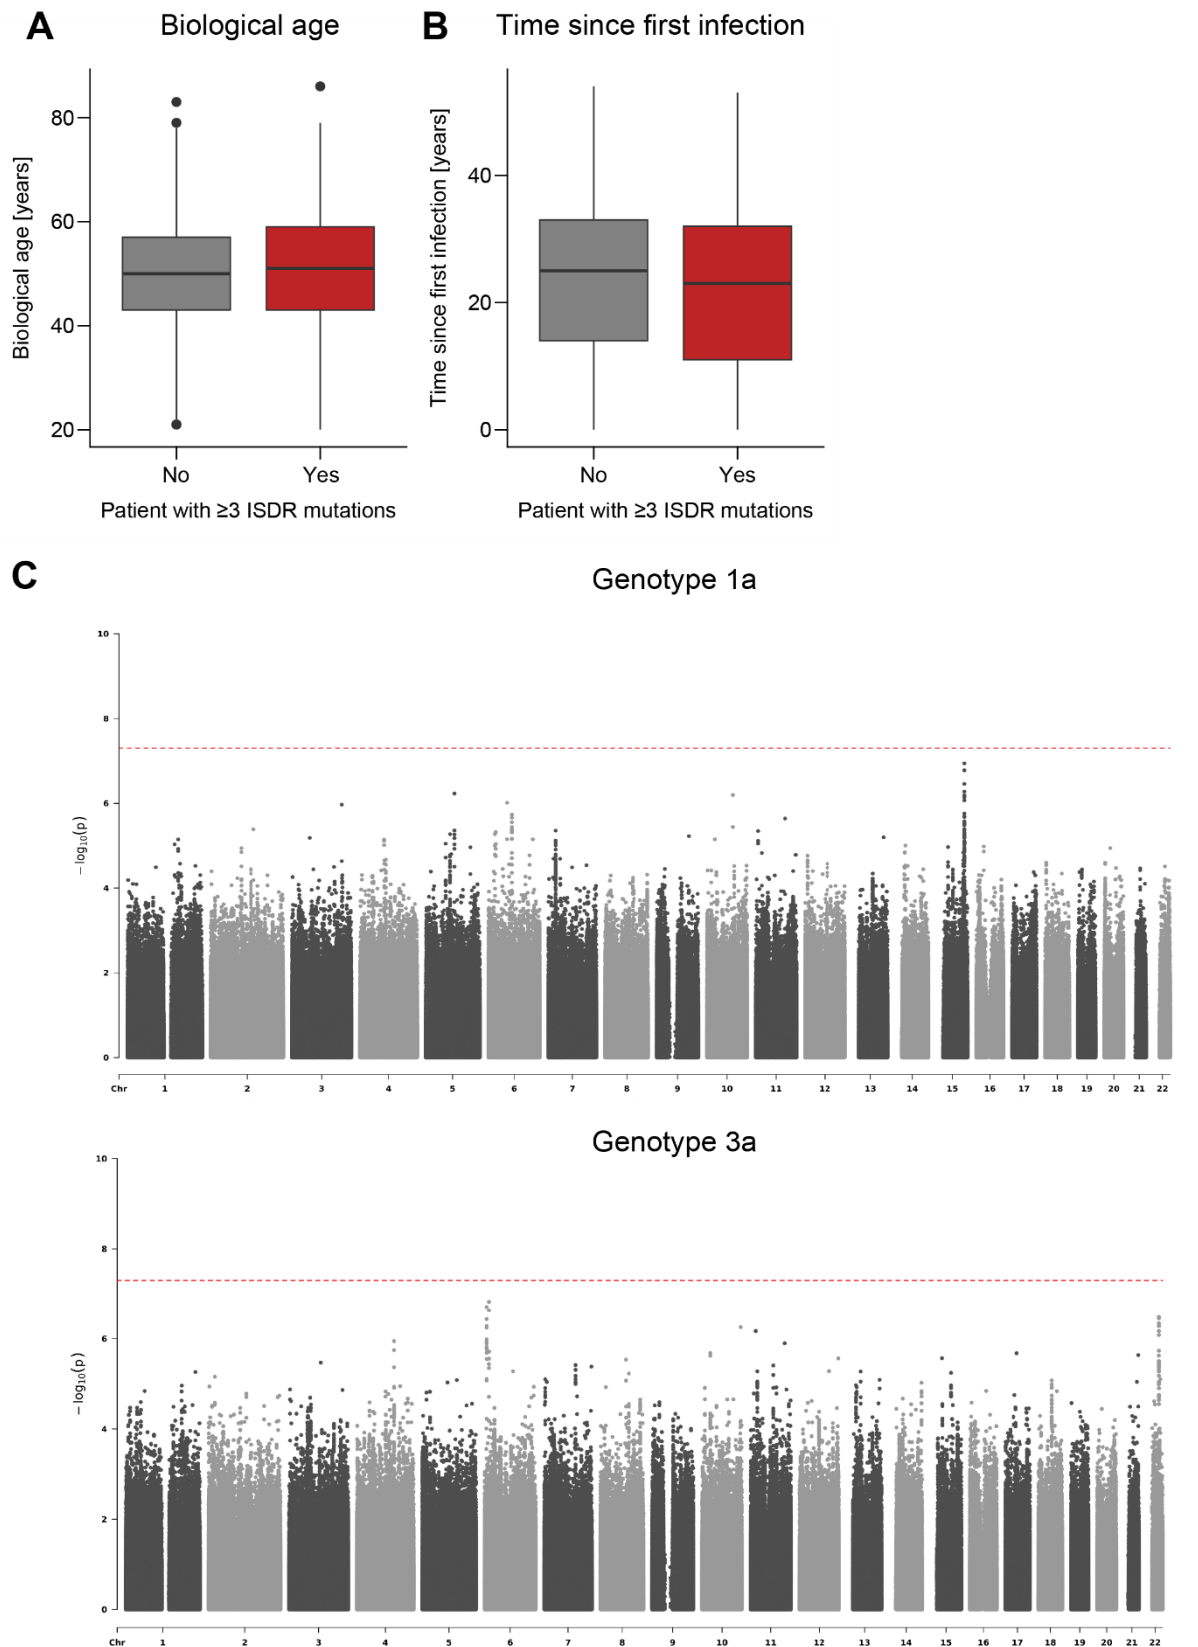

**Fig. S9: Genetic and temporal determinants of high RF.** A) Fraction of high replicators in the context of biological age. 273 potential high replicators were compared to 1841 potential low replicators. B) Fraction of high replicators in the context of time since first infection. 130 potential high replicators were compared to 843 potential low replicators. A&B) Data based on the HCV

Research UK cohort<sup>32</sup>. Statistical significance was determined using a two-sided Student's t-test. In none of the cases, a significant enrichment of potential high replicators was detected. C) Association between SNPs and patients being infected by a potential high replicator. 1347 gt1a and 1181 gt3a patients were analysed. The dashed red line indicates the threshold for statistical significance determined via logistic regression.



**Table S1: Oligo nucleotides used and generated during this project.**

| Name     | Sequence (5'-3')          | Description                                                                 | Gt |
|----------|---------------------------|-----------------------------------------------------------------------------|----|
| A_9416   | CAGGATGGCCTATTGGCCTGGAG   | cDNA generation <sup>21</sup>                                               | 1b |
| S_59     | TGTCTTCACGCAGAAAGCGTCTAG  | Nested PCR from cDNA to amplify N-terminal half of HCV genome <sup>21</sup> | 1b |
| S_93     | AAGCGTCTAGCCATGGCGTT      |                                                                             | 1b |
| A_5982   | TGACCAGGTCCTCGGTGGAG      |                                                                             | 1b |
| A_6103   | GCTATCAGCCGGTTCATCCACTGC  |                                                                             | 1b |
| S_4540   | GTAACGAGCTCGCCGCGCAGCTGTC |                                                                             | 1b |
| S_5120   | GTGCGCCAGGGCTCAGGCTCCACC  | Nested PCR from cDNA to amplify C-terminal half of HCV genome <sup>21</sup> | 1b |
| A_9364   | GGAGCAGGTAGATGCCTACCCCTAC |                                                                             | 1b |
| A_9386   | TTAGCTCCCCGTTTCATCGGTTGG  |                                                                             | 1b |
| S_6767   | ATTCCAGGTCGGGCTCAA        |                                                                             | 1b |
| S_6843   | ACTTCCATGCTCACCGACCC      | Nested PCR from cDNA to amplify ReED                                        | 1b |
| A_7501   | AGAGGGGGCATGGAGGAGTA      |                                                                             | 1b |
| A_7552   | ACGGTAGACCAAGACCCGTC      |                                                                             | 1b |
| A9400    | GGCCGGAGTGTTACCCCAACCTTC  | cDNA generation <sup>90</sup>                                               | 1a |
| S6583_1a | GCGCTGTGGAGGGTGTCTGC      | Nested PCR from cDNA to amplify ReED                                        | 1a |
| S6853_1a | TGACGTCCATGCTCACTG        |                                                                             | 1a |
| A7416_1a | CGGAAGTTGAGGAGCTGCC       |                                                                             | 1a |
| A7538_1a | AGATCCGGATCCCCAGGCTCC     |                                                                             | 1a |
| A9429_3a | ATGGAGTGTTATCCTACCAGC     | cDNA generation                                                             | 3a |
| S6872_3a | TGACCTCGATGTTGAGAGACC     | Nested PCR from cDNA to amplify ReED                                        | 3a |
| S6826_3a | ATAGGATCTCAACTCCCCTGTG    |                                                                             | 3a |
| A7488_3a | CTTGGAAGTAGTGCTGGACTG     |                                                                             | 3a |
| A7622_3a | ACGCTCTGCTCCTCGCTGTC      |                                                                             | 3a |

**Table S2: Patient characteristics of the gt1b post LTX patients.** na = not available.

| Name | Source    | Date sequenced pre LTX sample | LTX Date | Date sequenced post LTX sample | Date biopsy post LTX | Accession No. | Note |
|------|-----------|-------------------------------|----------|--------------------------------|----------------------|---------------|------|
| FCH1 | Barcelona | 17.03.11                      | 17.03.11 | 02.06.11                       | 02.05.11             | MK092096/7    |      |
| FCH2 | Barcelona | 21.02.12                      | 21.02.12 | 19.04.12                       | na                   | MK092098/9    |      |
| FCH3 | Barcelona | 09.10.12                      | 09.10.12 | 12.11.12                       | na                   | MK092100/1    |      |
| FCH4 | Barcelona | 22.11.13                      | 22.11.13 | 18.02.14                       | 12.02.14             | MK092102/3    |      |
| FCH5 | Barcelona | 01.01.14                      | 01.01.14 | 31.03.14                       | 06.02.14             | MK092104/5    |      |

|          |            |          |          |          |          |            |                          |
|----------|------------|----------|----------|----------|----------|------------|--------------------------|
| FCH6     | Barcelona  | 04.12.09 | 04.12.09 | 26.02.10 | na       |            |                          |
| FCH7     | Barcelona  | 22.02.12 | 22.02.12 | 11.06.12 | na       |            |                          |
| FCH8     | Barcelona  | 13.03.12 | 13.03.12 | 13.06.12 | na       |            |                          |
| FCH9     | Barcelona  | 25.03.12 | 25.03.12 | 14.05.12 | na       |            |                          |
| FCH10    | Barcelona  | 30.04.13 | 30.04.13 | 05.08.13 | na       |            |                          |
| FCH11    | Barcelona  | 24.07.13 | 24.07.13 | 29.08.13 | na       |            |                          |
| FCH12    | Barcelona  | 10.10.13 | 10.10.13 | 29.01.14 | 09.12.13 |            |                          |
| Non-FCH1 | Barcelona  | 05.01.01 | 05.01.01 | 29.03.01 | na       | MK092106/7 |                          |
| Non-FCH2 | Barcelona  | 13.04.07 | 13.04.07 | 20.06.07 | na       | MK092108/9 |                          |
| Non-FCH3 | Barcelona  | 09.09.01 | 09.09.01 | 16.11.01 | na       | MK092110/1 |                          |
| Non-FCH4 | Heidelberg | na       | 12.11.09 | 10.01.12 | na       |            | Previous LTX on 09.08.07 |
| Non-FCH5 | Heidelberg | na       | 29.03.12 | 24.08.12 | na       |            |                          |
| Non-FCH6 | Heidelberg | na       | 08.10.11 | 13.11.12 | na       |            | Previous LTX on 28.09.11 |
| Non-FCH7 | Freiburg   | na       | 12.2011  | 07.11.12 | na       |            |                          |
| Non-FCH8 | Essen      | na       | 03.12.12 | 03.06.13 | na       |            |                          |
| Non-FCH9 | Essen      | na       | 05.12.12 | 05.06.13 | na       |            |                          |

**Table S3: DNA plasmids used and generated during this project.**

| Name                         | Description                                                          |
|------------------------------|----------------------------------------------------------------------|
| <b>pFK</b>                   | Plasmid containing a T7 promotor for <i>in vitro</i> transcription   |
| pFK i341 NS3-3' Con1         | Bicistronic SGR of the prototype gt1b wildtype isolate <sup>13</sup> |
| pFK i341 NS3-3' Con1 ΔGDD    | Replication deficient negative control                               |
| pFK i341 NS3-3' GLT1         | gt1b wildtype isolate <sup>21</sup>                                  |
| pFK JC1                      | Prototype isolate for infection experiments <sup>89</sup>            |
| pFK JcN2A                    | JC1 with a Nluc reporter <sup>91</sup>                               |
| pFK JcN2A ΔGDD               | Replication deficient negative control                               |
| pFK JcN2A ΔE1E2              | Infection deficient negative control                                 |
| pFK i389 NS3-3' GLT1         | Monocistronic GLT1 SGR                                               |
| pFK i389 NS3-3' preLTX1α     | Monocistronic SGRs of the different timepoints of the GLT1 patient   |
| pFK i389 NS3-3' preLTX1β     |                                                                      |
| pFK i389 NS3-3' postLTX1     |                                                                      |
| pFK i389 NS3-3' 6 w postLTX2 |                                                                      |
| pFK i389 preLTX1α G5A.ReED   | Chimeras of the pre LTX timepoints harbouring the GLT1.ReED or ISDR  |
| pFK i389 preLTX1β G5A.ISDR   |                                                                      |
| pFK i389 preLTX1β G5A.ReED   |                                                                      |
| pFK i389 N2A preLTX1α/C3JFH1 |                                                                      |

|                                       |                                                                                                |
|---------------------------------------|------------------------------------------------------------------------------------------------|
| pFK i389 N2A preLTX1 $\beta$ /C3JFH1  | Chimeras of the indicated assembly module and the JFH1 replicase to assess particle production |
| pFK i389 N2A preLTX1 $\gamma$ /C3JFH1 |                                                                                                |
| pFK i389 N2A postLTX1/C3JFH1          |                                                                                                |
| pFK i341 NS3-3' Con1 gt1b.ReED        | Con1 based chimera harbouring the gt1b consensus ReED                                          |
| pFK i341 NS3-3' Con1 FCH1.ReED        | Con1 based chimeras harbouring patient derived ReEDs from time points pre or post LTX          |
| pFK i341 NS3-3' Con1 FCH2_pre.ReED    |                                                                                                |
| pFK i341 NS3-3' Con1 FCH2_post.ReED   |                                                                                                |
| pFK i341 NS3-3' Con1 FCH3.ReED        |                                                                                                |
| pFK i341 NS3-3' Con1 FCH4_pre.ReED    |                                                                                                |
| pFK i341 NS3-3' Con1 FCH4_post.ReED   |                                                                                                |
| pFK i341 NS3-3' Con1 FCH5_pre.ReED    |                                                                                                |
| pFK i341 NS3-3' Con1 FCH5_post.ReED   |                                                                                                |
| pFK i341 NS3-3' Con1 BHCV1.ReED       |                                                                                                |
| pFK i341 NS3-3' Con1 Non-FCH1.ReED    |                                                                                                |
| pFK i341 NS3-3' Con1 Non-FCH2.ReED    |                                                                                                |
| pFK i341 NS3-3' Con1 Non-FCH3.ReED    |                                                                                                |
| pFK i341 NS3-3' Con1 FCH6_pre.ReED    |                                                                                                |
| pFK i341 NS3-3' Con1 FCH6_post.ReED   |                                                                                                |
| pFK i341 NS3-3' Con1 FCH7_pre.ReED    |                                                                                                |
| pFK i341 NS3-3' Con1 FCH7_post.ReED   |                                                                                                |
| pFK i341 NS3-3' Con1 FCH8_pre.ReED    |                                                                                                |
| pFK i341 NS3-3' Con1 FCH8_post.ReED   |                                                                                                |
| pFK i341 NS3-3' Con1 FCH9_pre.ReED    |                                                                                                |
| pFK i341 NS3-3' Con1 FCH9_post.ReED   |                                                                                                |
| pFK i341 NS3-3' Con1 FCH10_pre.ReED   |                                                                                                |
| pFK i341 NS3-3' Con1 FCH10_post.ReED  |                                                                                                |
| pFK i341 NS3-3' Con1 FCH11.ReED       |                                                                                                |
| pFK i341 NS3-3' Con1 FCH12.ReED       |                                                                                                |
| pFK i341 NS3-3' Con1 Non-FCH4.ReED    |                                                                                                |
| pFK i341 NS3-3' Con1 Non-FCH5.ReED    |                                                                                                |
| pFK i341 NS3-3' Con1 Non-FCH6.ReED    |                                                                                                |
| pFK i341 NS3-3' Con1 Non-FCH7.ReED    |                                                                                                |
| pFK i341 NS3-3' Con1 Non-FCH8.ReED    |                                                                                                |
| pFK i341 NS3-3' Con1 Non-FCH9.ReED    |                                                                                                |
| pFK i341 NS3-3' Con1 EC1.ReED         |                                                                                                |
| pFK i341 NS3-3' GLT1 Con1.ReED        | GLT1 based chimera harbouring the Con1 ReED                                                    |
| pFK N2A Con1 fl. $\Delta$ GDD         | Replication deficient negative control                                                         |
| pFK N2A Con1 fl.                      | Con1 WT or Con1 based chimeric replicons to assess replication of full-length constructs       |
| pFK N2A Con1 fl. GLT1.ReED            |                                                                                                |
| pFK N2A Con1 fl. FCH3.ReED            |                                                                                                |
| pFK i341 NS3-3' FCH3                  | SGR of the consensus sequence of patient FCH3                                                  |
| pFK i341 NS3-3' FCH4                  | SGR of the consensus sequence of patient FCH4                                                  |
| pFK i341 NS3-3' H77                   | Prototype gt1a isolate <sup>92</sup>                                                           |
| pFK i341 NS3-3' H77 1a_LTX1.ReED      | H77 based chimeras harbouring patient derived ReEDs                                            |
| pFK i341 NS3-3' H77 1a_LTX2.ReED      |                                                                                                |
| pFK i341 NS3-3' H77 1a_LTX3.ReED      |                                                                                                |
| pFK i341 NS3-3' H77 1a_LTX4.ReED      |                                                                                                |

|                                    |                                                                    |
|------------------------------------|--------------------------------------------------------------------|
| pFK i341 NS3-3' H77 1a_LTX5.ReED   |                                                                    |
| pFK i341 NS3-3' H77 1a_LTX6.ReED   |                                                                    |
| pFK i341 NS3-3' H77 1a_LTX7.ReED   |                                                                    |
| pFK i341 NS3-3' H77 1a_LTX8.ReED   |                                                                    |
| pFK i341 NS3-3' H77 1a_LTX9.ReED   |                                                                    |
| pFK i341 NS3-3' H77 gt1a_cons.ReED | H77 based chimera harbouring the gt1a consensus ReED               |
| pFK i341 NS3-3' Con1 GLT1.ISDR     | Chimeras for mapping of the ReED between Con1 and GLT1             |
| pFK i341 NS3-3' Con1 G.2209-2280   |                                                                    |
| pFK i341 NS3-3' Con1 G.2209-2283   |                                                                    |
| pFK i341 NS3-3' Con1 G.2209-2285   |                                                                    |
| pFK i341 NS3-3' Con1 G.2209-2303   |                                                                    |
| <b>pUC</b>                         | Plasmid containing a T7 promotor for <i>in vitro</i> transcription |
| pUC i389 NS3-3' BHCV1              | SGR of the consensus sequence of patient BHCV1 <sup>27</sup>       |
| pUC i387 NS3-3' S52                | Prototype gt3a isolate <sup>35</sup>                               |
| pUC i387 NS3-3' S52 gt3a_cons.ReED | S52 based chimera harbouring the gt3a consensus ReED               |
| pUC i387 NS3-3' S52 UK1.ReED       | S52 based chimeras harbouring patient derived ReEDs                |
| pUC i387 NS3-3' S52 UK2.ReED       |                                                                    |
| pUC i387 NS3-3' S52 UK3.ReED       |                                                                    |
| pUC i387 NS3-3' S52 UK4.ReED       |                                                                    |
| pUC i387 NS3-3' S52 UK5.ReED       |                                                                    |
| pUC i387 NS3-3' S52 UK6.ReED       |                                                                    |
| pUC i387 NS3-3' S52 UK7.ReED       |                                                                    |
| pUC i387 NS3-3' S52 UK8.ReED       |                                                                    |
| pUC i387 NS3-3' S52 UK9.ReED       |                                                                    |
| pUC i387 NS3-3' S52 UK10.ReED      |                                                                    |
| pUC i387 NS3-3' ED43               | Prototype gt4a isolate <sup>35</sup>                               |
| pUC i387 NS3-3' ED43 4a_cons.ReED  | ED43 based chimera harbouring the gt4a consensus ReED              |
| pUC i387 NS3-3' ED43 Pat1.ReED     | ED43 based chimeras harbouring patient derived ReEDs               |
| pUC i387 NS3-3' ED43 Pat2.ReED     |                                                                    |
| pUC i387 NS3-3' ED43 Pat3.ReED     |                                                                    |
| pUC i387 NS3-3' ED43 Pat4.ReED     |                                                                    |
| pUC i387 NS3-3' ED43 Pat5.ReED     |                                                                    |
| pUC i387 NS3-3' ED43 Pat6.ReED     |                                                                    |
| <b>Other</b>                       |                                                                    |

|                              |                     |
|------------------------------|---------------------|
| pCMV DR 8.74                 | Production of HCVpp |
| pCMV Luc                     |                     |
| pczVSV-Gwt                   |                     |
| pcDNA3cE1E2Con1              |                     |
| pcDNA3cE1E2 preLTX1 $\alpha$ |                     |
| pcDNA3cE1E2 preLTX1 $\beta$  |                     |
| pcDNA3cE1E2 preLTX1 $\gamma$ |                     |
| pcDNA3cE1E2 postLTX1         |                     |
| pcDNA3cE1E2 GLT1             |                     |
|                              |                     |
